# Supplementary material
Source: ML conference proceedings conference paper supplement (https://proceedings.neurips.cc/paper_files/paper/2019/hash/43ec517d68b6edd3015b3edc9a11367b-Abstract.html)

# Supplementary Material for FreeAnchor

## 1 The code for FreeAnchor

The files in the directory “Code for FreeAnchor” contain implementation details of our approach, which can be reproduced by following the “README.md” file.

## 2 Detection examples on MS-COCO *val* set

**Left:** RetinaNet-ResNeXt-101

**Right:** FreeAnchor-ResNeXt-101

**Red boxes:** By FreeAnchor

**Blue boxes:** By FreeAnchor and RetinaNet

### 2.1 Slender objects

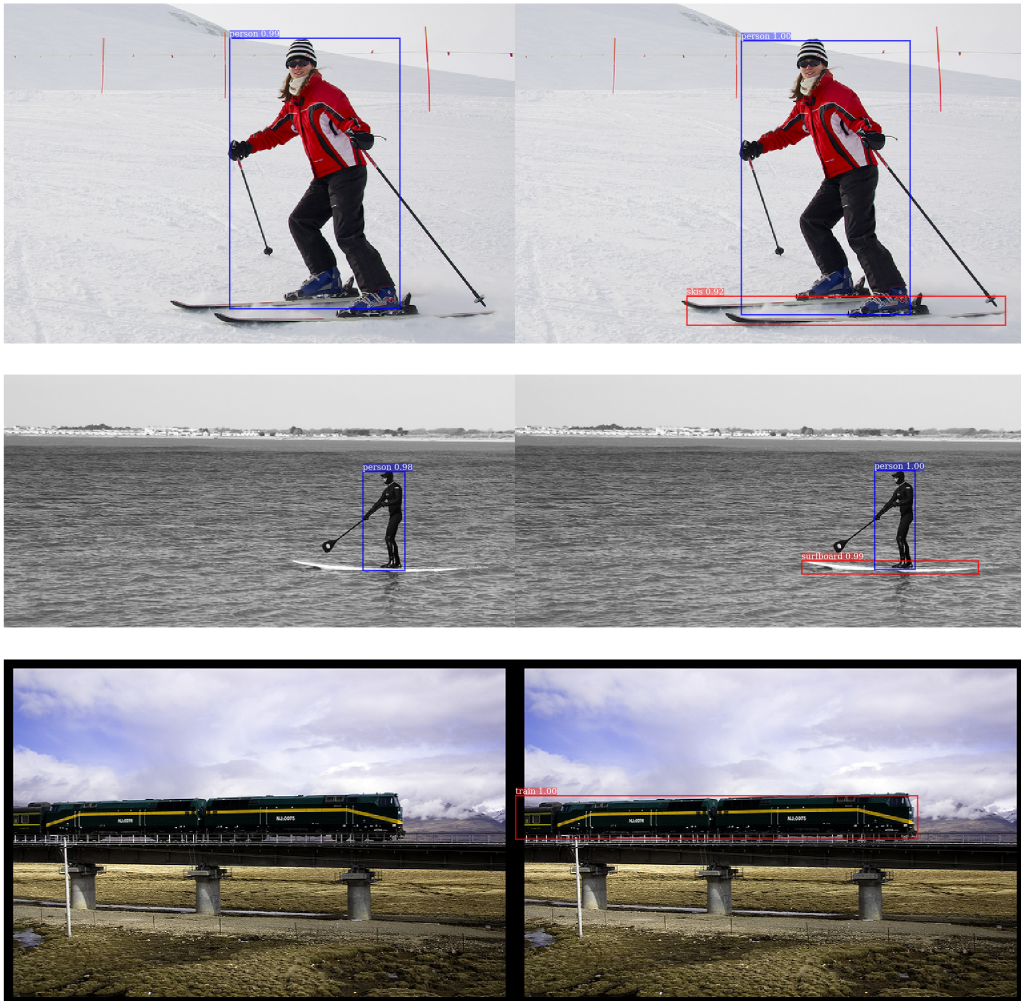

9 2.2 Occluded objects

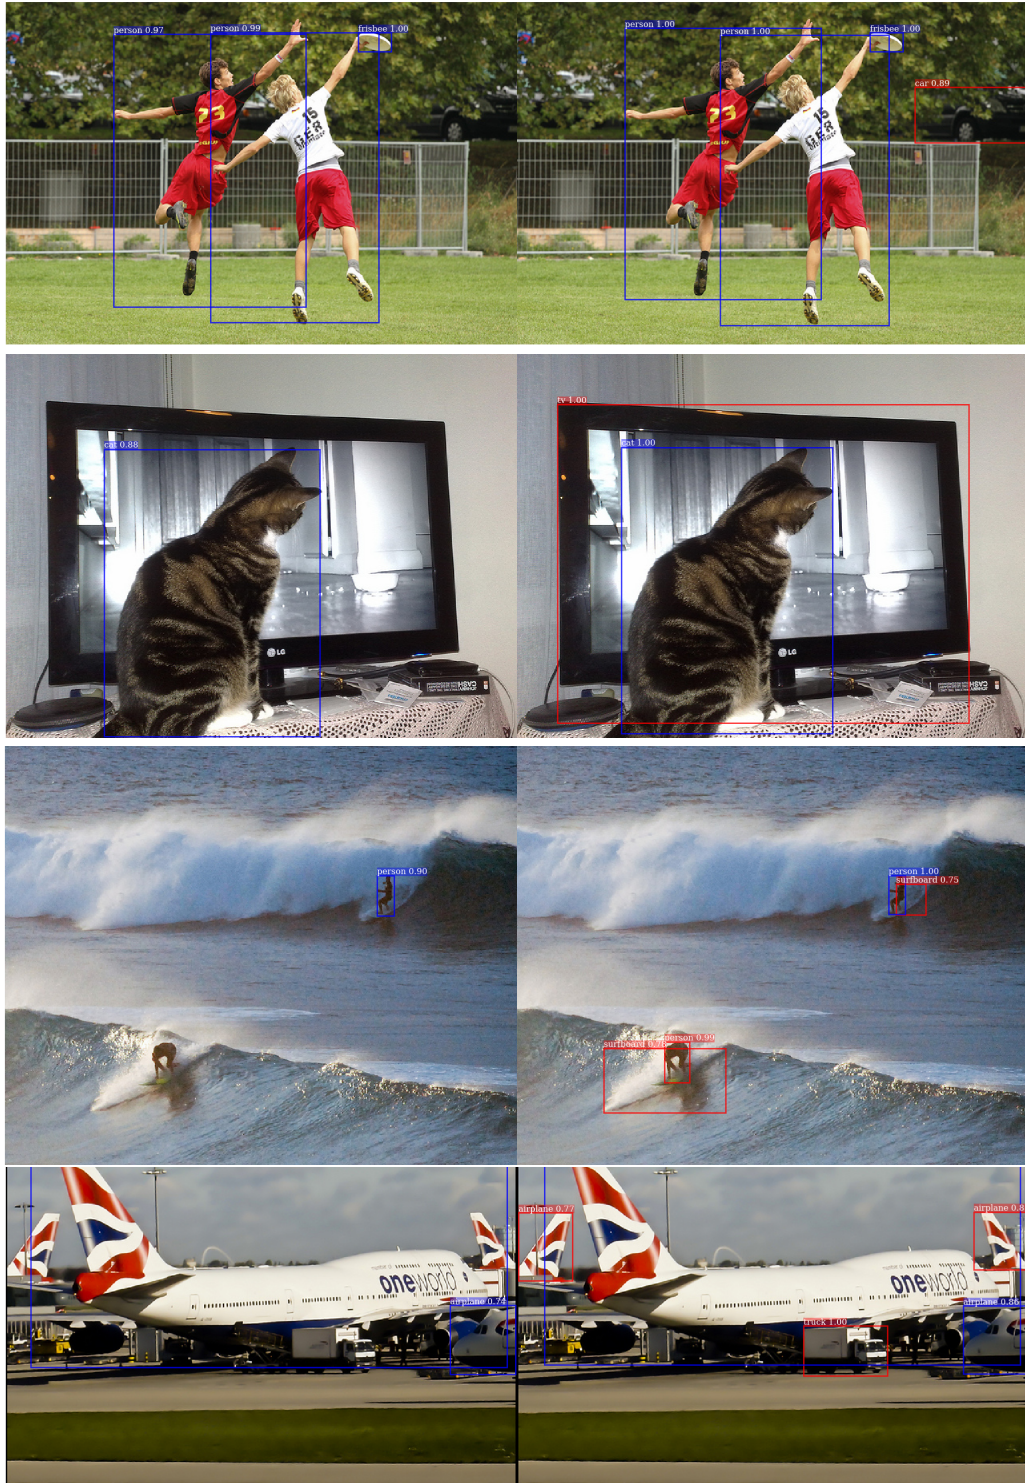



10 **2.3 Crowded objects**

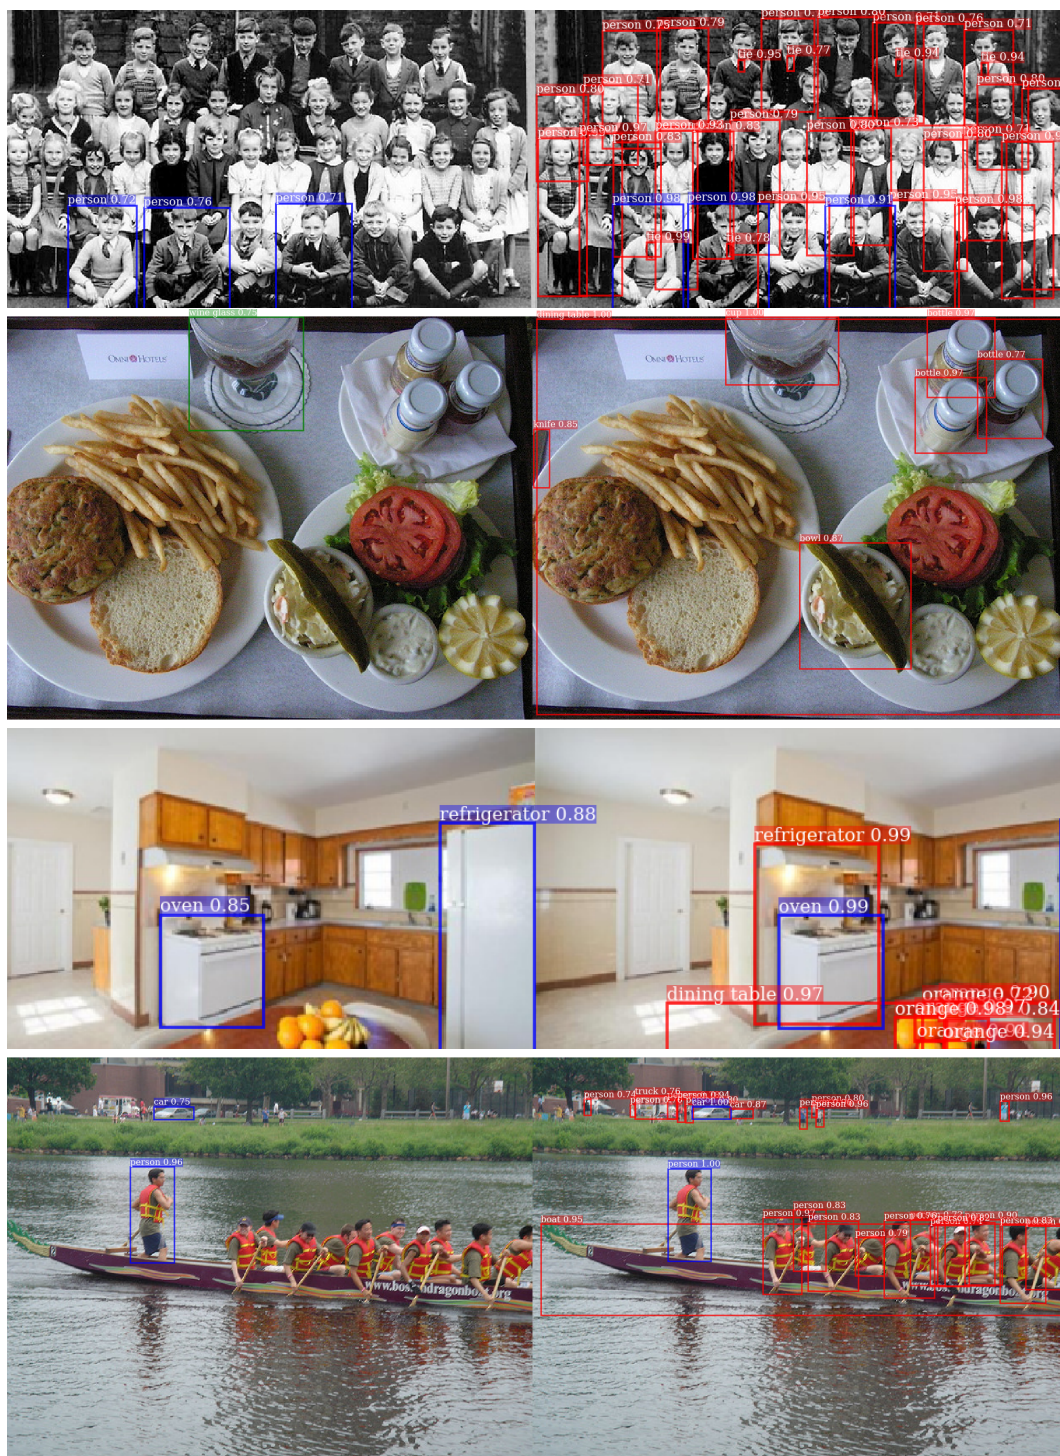



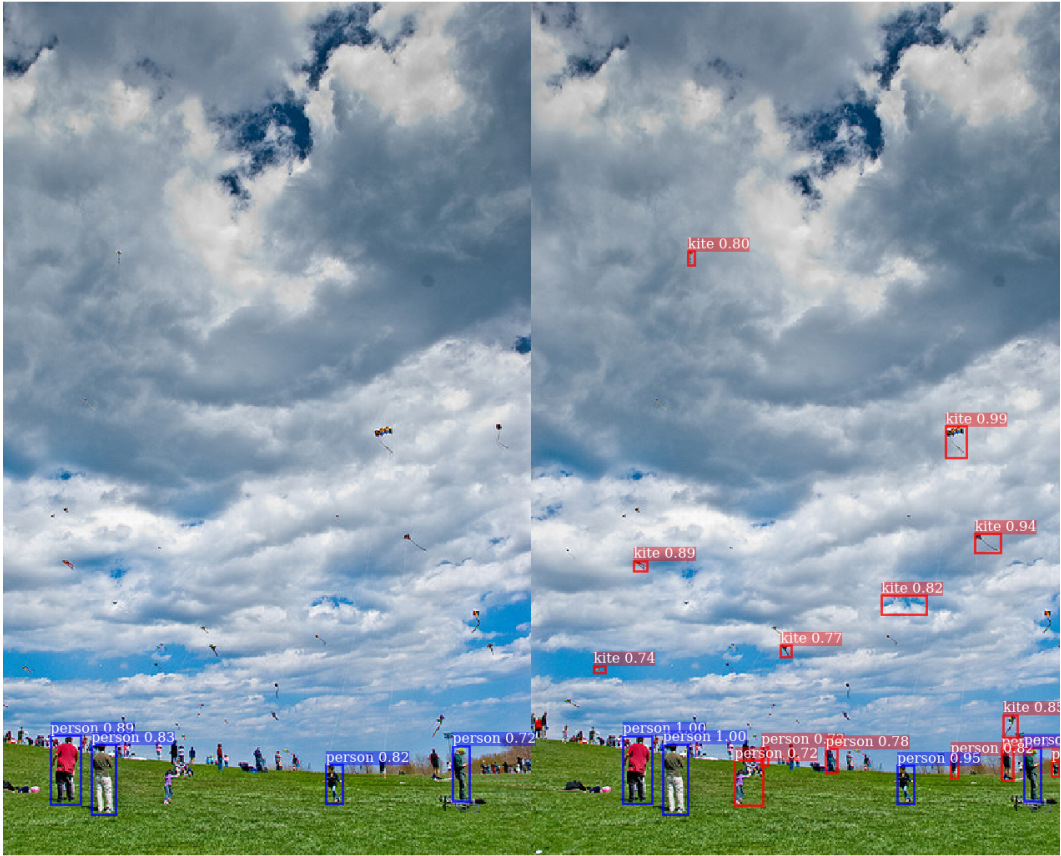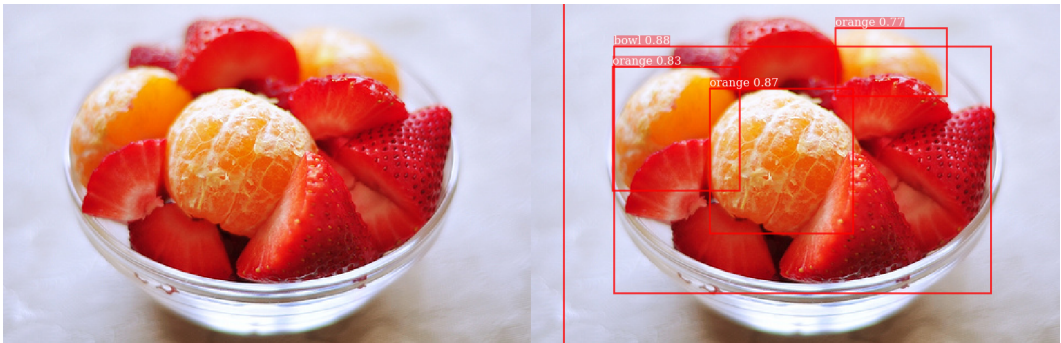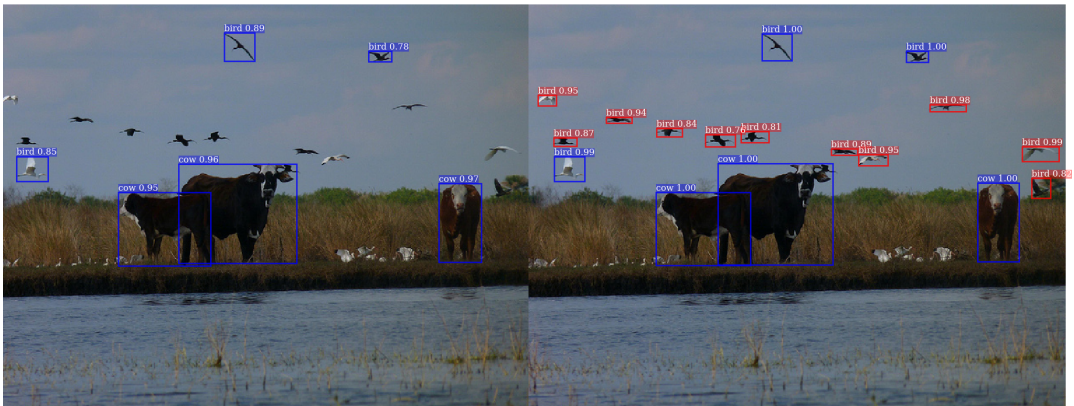

Supplement: Supplementary file [file 43ec517d68b6edd3015b3edc9a11367b-Supplemental.zip]
